# Supplementary material for: Thermodynamic analysis of the synthesis of silicon carbide nanofibers from exfoliated graphite and amorphous silica
Source: Royal Society of Chemistry journal article supplement (doi:10.1039/c3ce42414f), 2014-01-01
Supplement: c3ce42414f.pdf [file c3ce42414f.pdf]

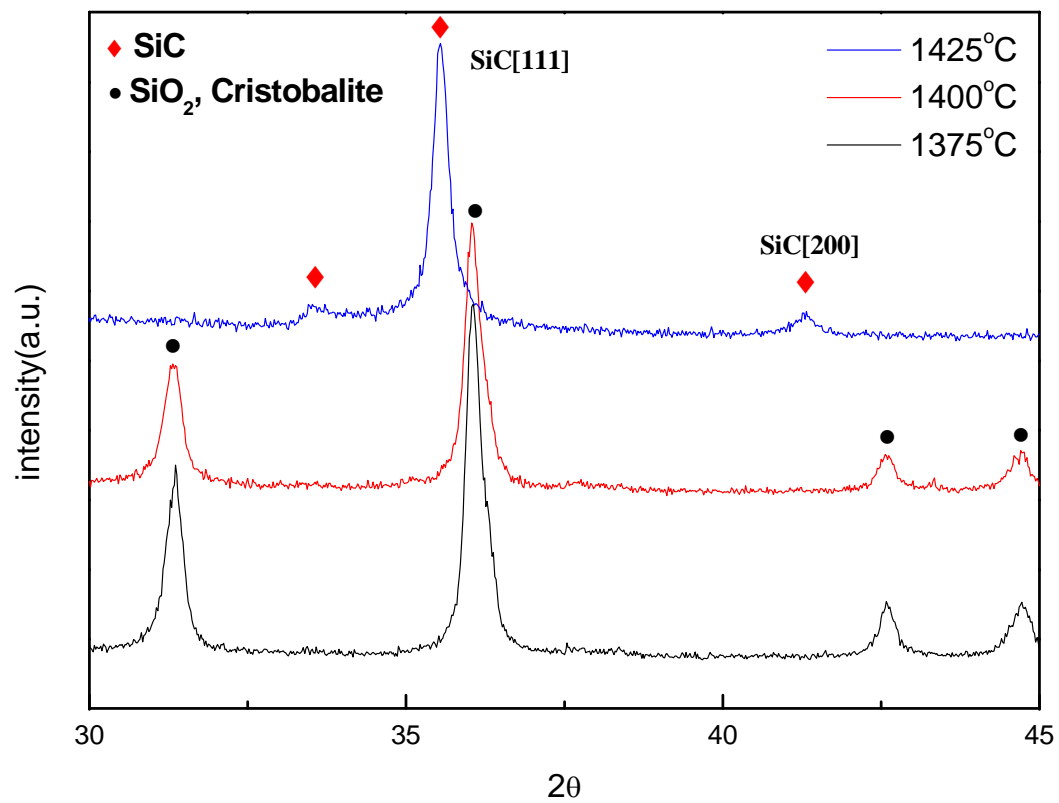

Supplementary Figure 1. X-ray diffraction patterns for the samples produced at 1370°C, 1400°C and 1425°C , respectively.

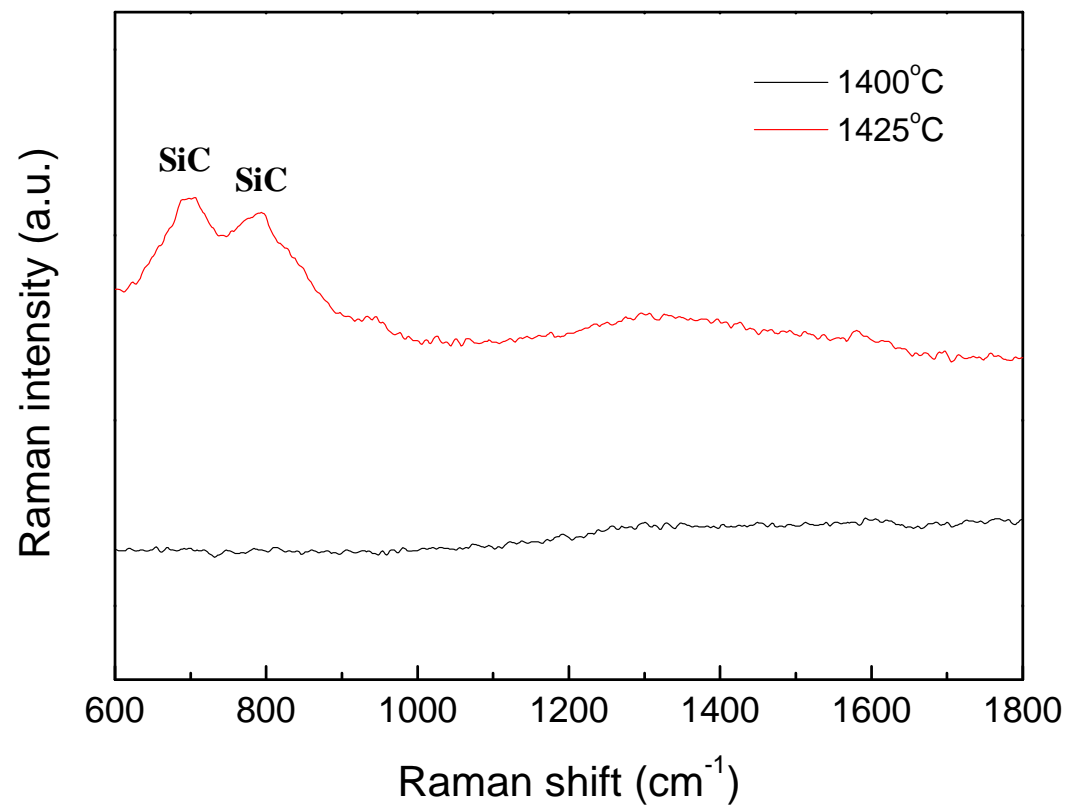

Supplementary Figure 2. Raman spectra for the samples produced at  $1400^\circ\text{C}$  and  $1425^\circ\text{C}$
